# Supplementary material
Source: publisher site journal article supplement (https://www.dovepress.com/article/380810)
Supplement: Supplementary file 1 [file get_supplementary_file.php]

## Supplementary materials

| PLGA<br>(ng/ml) | Dexamethasone<br>(ng/ml) | Dexamethasone<br>Quantification<br>( $\mu\text{g}/100\mu\text{l}$ ) |
|-----------------|--------------------------|---------------------------------------------------------------------|
| 1               | 1                        | 4.28( $\pm 0.12$ )                                                  |
|                 | 2                        | 6.22( $\pm 0.32$ )                                                  |
|                 | 4                        | 8.65( $\pm 0.16$ )                                                  |
|                 | 5                        | 9.12( $\pm 0.05$ )                                                  |
| 5               | 1                        | 16.58( $\pm 0.19$ )                                                 |
|                 | 2                        | 19.60( $\pm 0.41$ )                                                 |
|                 | 4                        | 24.18( $\pm 0.09$ )                                                 |
|                 | 5                        | 24.55( $\pm 0.21$ )                                                 |
| 10              | 1                        | 35.21( $\pm 0.06$ )                                                 |
|                 | 2                        | 35.85( $\pm 0.54$ )                                                 |
|                 | 4                        | 36.22( $\pm 0.09$ )                                                 |
|                 | 5                        | 36.35( $\pm 0.25$ )                                                 |

**Supplementary Table S1.** Dexamethasone quantification of PD-NPs
